# Supplementary material for: Know your epidemic, know your response: Early perceptions of COVID-19 and self-reported social distancing in the United States
Source: PubMed Central journal article supplement (PMC7473541; doi:10.1371/journal.pone.0238341), 2020-09-04
Supplement: pone.0238341.s001.pdf [file pone.0238341.s001.pdf]

**S1 Table: Demographics characteristics of the sample**

|                         | Mean   | Std    |
|-------------------------|--------|--------|
| Male                    | 0.483  | 0.500  |
| Age                     | 48.065 | 17.161 |
| Bachelor degree or more | 0.333  | 0.471  |
| White                   | 0.766  | 0.423  |
| Black                   | 0.128  | 0.334  |
| Married                 | 0.537  | 0.499  |
| CA/NY/WA                | 0.222  | 0.416  |

*Notes:* The table shows the weighted mean and standard deviation of basic demographic characteristics. We use sample weights to make the survey representative of the U.S. population aged 18 and older. Data come from “Understanding America Study” (UAS) collected between March 10 and March 16, 2020.
