# Supplementary material for: Know your epidemic, know your response: Early perceptions of COVID-19 and self-reported social distancing in the United States
Source: PubMed Central journal article supplement (PMC7473541; doi:10.1371/journal.pone.0238341), 2020-09-04
Supplement: pone.0238341.s002.pdf [file pone.0238341.s002.pdf]

**S2 Table: Compare characteristics of respondents and non-respondents**

|                         | Respondents | Non-respondents | $\chi^2$ | p-value |
|-------------------------|-------------|-----------------|----------|---------|
| Male                    | 0.49        | 0.471           | 1.368    | .242    |
| Age                     | 49.289      | 46.643          | 23.803   | 0.000   |
| Bachelor degree or more | .349        | .32             | 3.967    | 0.046   |
| White                   | .771        | .768            | 0.058    | .81     |
| Black                   | .121        | .138            | 2.222    | .136    |
| Married                 | .567        | .513            | 11.647   | 0.001   |
| CA/NY/WA                | .199        | .081            | 160.665  | 0.000   |

*Notes:* The table shows the weighted mean of basic demographic characteristics for UAS participants who answered the survey by March 16 and for UAS participants who did not. We use sample weights to make the survey representative of the U.S. population aged 18 and older. The weights are different from those in the rest of the paper as they are constructed to make the whole UAS sample nationally representative. Data come from “Understanding America Study” (UAS) collected between March 10 and March 16, 2020.
